# Supplementary material
Source: PubMed Central journal article supplement (PMC3587116)
Supplement: NIHMS441559-supplement-1_si_001.pdf [file NIHMS441559-supplement-1_si_001.pdf]

# Supporting Information

## Wide field-of-view on-chip Talbot fluorescence microscopy for longitudinal cell culture monitoring from within the incubator

Chao Han,<sup>1§\*</sup> Shuo Pang,<sup>1§</sup> Danielle V. Bower,<sup>2</sup> Patrick Yiu,<sup>1</sup> and Changhuei Yang<sup>1</sup>

<sup>1</sup> Electrical Engineering, California Institute of Technology, Pasadena, CA 91125, USA

<sup>2</sup> Division of Biology and the Biological Imaging Center, California Institute of Technology, Pasadena, CA 91125, USA

§ These authors contributed equally to this work.

\* Corresponding author. Email: [chan@caltech.edu](mailto:chan@caltech.edu) Fax: (626) 395-3786

Supplementary figures:

|                   |                                                                                               |
|-------------------|-----------------------------------------------------------------------------------------------|
| <b>Figure S-1</b> | The fabrication process of the microfluidic component and its packaging with the image sensor |
| <b>Figure S-2</b> | The measurement of sensor surface temperature                                                 |
| <b>Figure S-3</b> | Cell segmentation and counting using the watershed algorithm                                  |

Supplementary movie:

**Movie S-1.** The wide FOV time-lapse imaging of the HeLa cells expressing H2B-eGFP at 33 min intervals over a total duration of 24.8 hours.

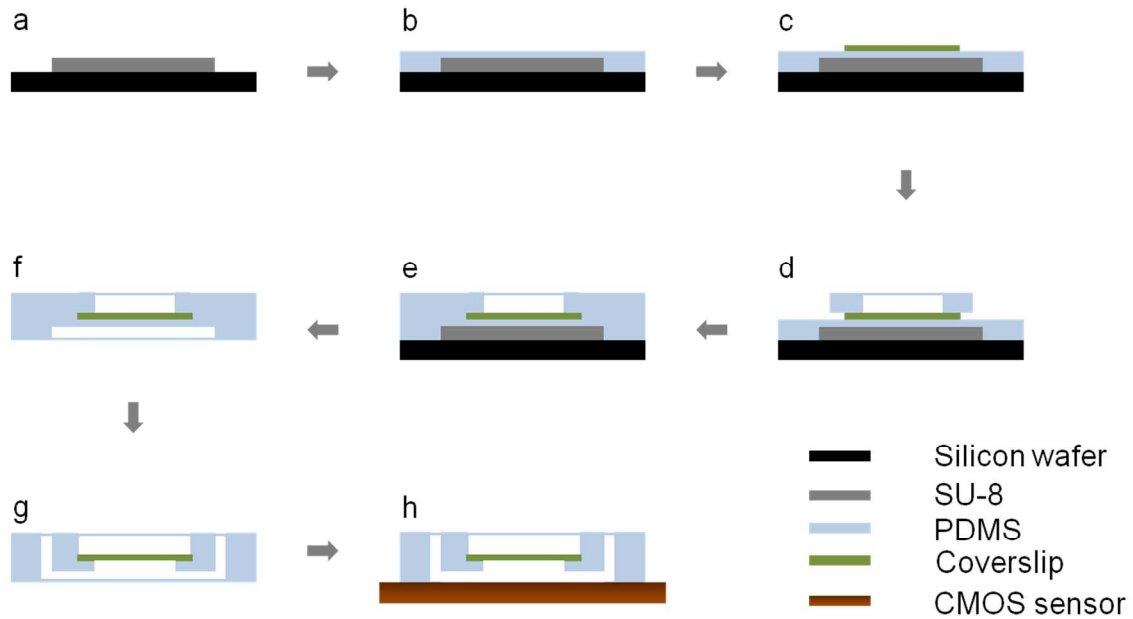

**Figure S-1.** The fabrication process of the microfluidic component and its packaging with the image sensor. (a) SU-8 photoresist with a thickness of 200  $\mu\text{m}$  was patterned onto a 3-inch silicon wafer to form a master. (b) Liquid PDMS prepolymer solution was poured onto the master and cured at 80  $^{\circ}\text{C}$  for 1 h. (c) A 5 mm diameter coverslip was aligned and attached above the SU-8 culture chamber pattern. (d) Another PDMS block with a 4 mm diameter hole was aligned and attached to the coverslip. (e) The PDMS prepolymer was again poured onto the first PDMS layer, and cured at 80  $^{\circ}\text{C}$  for 1 h to fill the gap around the coverslip. (f) The whole PDMS structure was peeled off from the master. (g) The PDMS layer beneath the coverslip was removed and the 4 mm diameter hole above the coverslip was enlarged to 5 mm. A 1 mm hole was punched at the end of each channel to form the inlet and outlet. (h) The structure was attached to a filter-coated CMOS sensor with the edges sealed by PDMS.

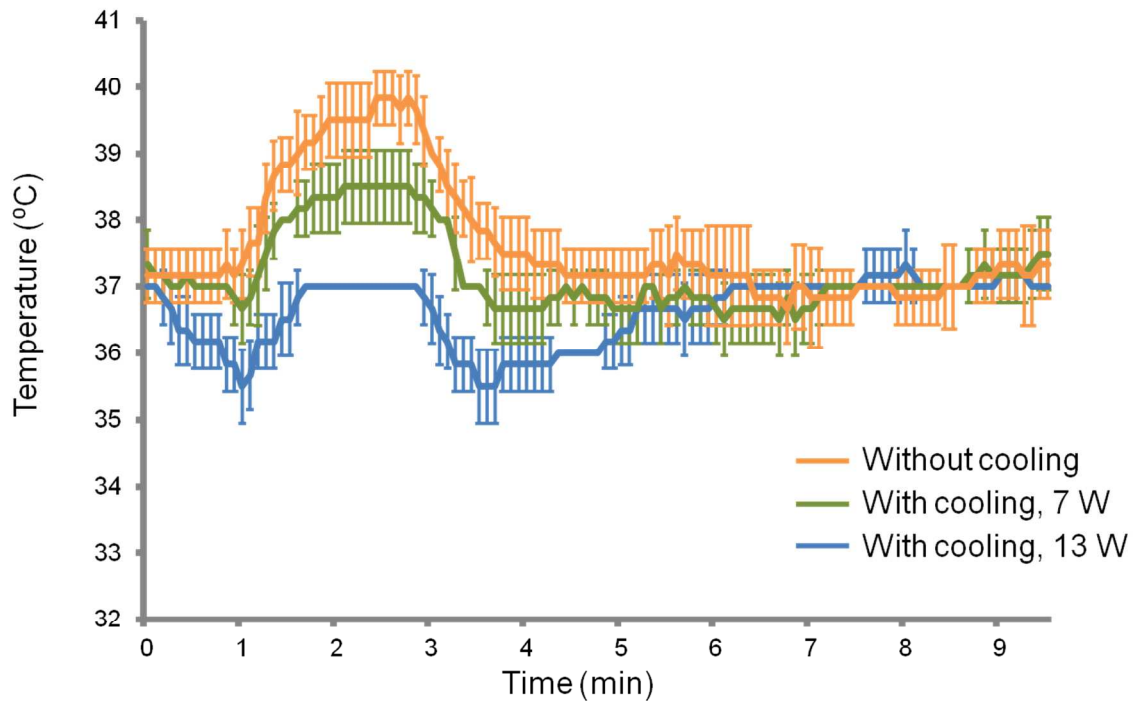

**Figure S-2.** The measurement of sensor surface temperature during the imaging of a 13 mm<sup>2</sup> area. Six measurements were repeated in total. The 0-1.0 min is for pre-cooling, 1.0-2.4 min for imaging, and 2.4-2.9 min for data storage.

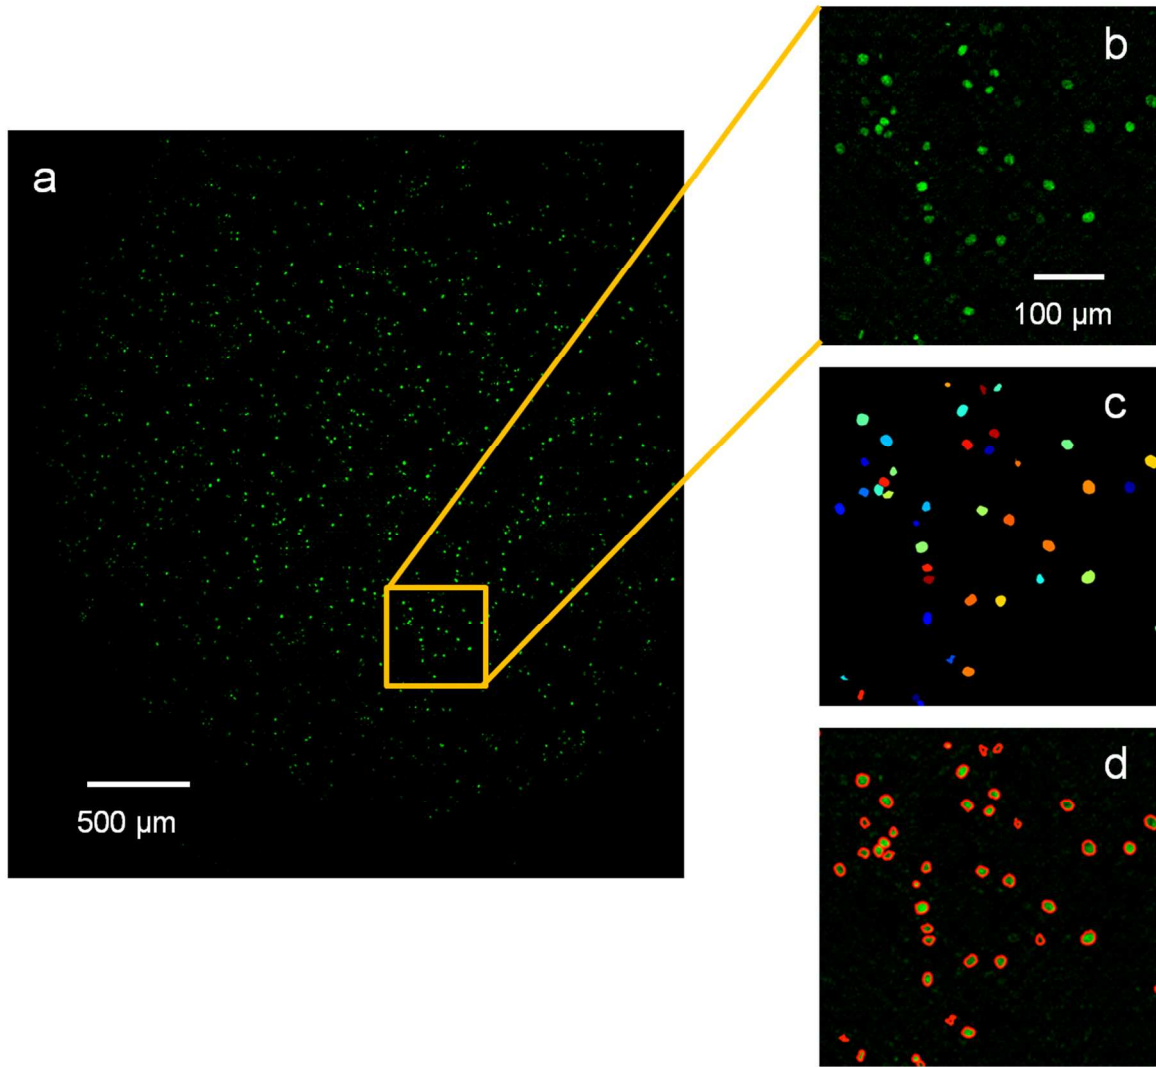

**Figure S-3.** Cell segmentation and counting using the watershed algorithm. (a) The reconstructed high resolution image. (b) A typical region from (a). (c) The result of the segmentation by the watershed algorithm. (d) The segmentation result overlaid with the original image.
